# Supplementary material for: Fucoxanthinol from the Diatom Nitzschia Laevis Ameliorates Neuroinflammatory Responses in Lipopolysaccharide-Stimulated BV-2 Microglia
Source: PubMed Central journal article supplement (PMC7074591; doi:10.3390/md18020116), 2020-02-17
Supplement: marinedrugs-18-00116-s001.pdf [file marinedrugs-18-00116-s001.pdf]

## Fucoxanthinol from the diatom *Nitzschia laevis* ameliorates neuroinflammatory responses in lipopolysaccharide-stimulated BV-2 microglia

Yuelian Li<sup>1</sup>, Lu Liu<sup>1,2</sup>, Peipei Sun<sup>1</sup>, Yifeng Zhang<sup>1</sup>, Tao Wu<sup>1</sup>, Han Sun<sup>1,2</sup>, Ka-Wing Cheng<sup>2</sup>, Feng Chen<sup>2\*</sup>

<sup>1</sup> Institute for Food and Bioresource Engineering, College of Engineering, Peking University, Beijing 100871, China; 1501111655@pku.edu.cn (Y.L.); ll652866844@163.com (L.L.); zixinsp@163.com (P.S.); yifengzhang@pku.edu.cn (Y.Z.); 1501111658@pku.edu.cn (T.W.); shlyg2242@163.com (H.S.);

<sup>2</sup> Institute for Advanced Study, Shenzhen University, Shenzhen 518060, China; shlyg2242@163.com (H.S.); kcheng2018@126.com (K.-W.C); sfchen@szu.edu.cn and sfchencoe@pku.edu.cn (F.C.)

\* Correspondence: sfchen@szu.edu.cn and sfchencoe@pku.edu.cn; Tel.: +86 10 62745356 (F.C.); ORCID: 0000-0002-9054-943X

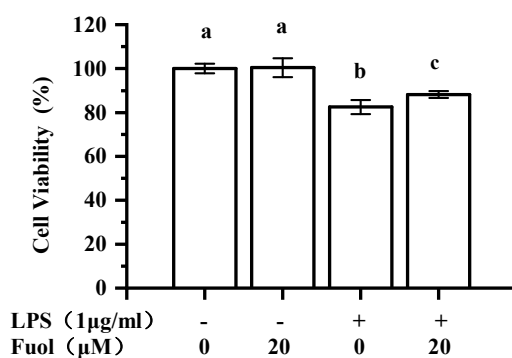

**Figure S1** Effect of fucoxanthinol on cell viability in LPS-activated BV-2 cells. BV-2 cells were pretreated with fucoxanthinol (20 µM) for 4 h, and then incubated with LPS (1 µg/mL) for 24 h. Then, the cytotoxicity of Fuol was measured by CCK-8 assay and data were normalized as % of control. Values are presented as the means ± SD of five independent experiments in triplicate. Different letters in the columns indicate significant difference ( $p < 0.05$ ).
